# Supplementary material for: Influence of ligand variation on the deactivation process of metal-to-ligand charge transfer excited states in quadruply bonded dimolybdenum complexes
Source: Royal Society of Chemistry journal article supplement (doi:10.1039/d3cp03679k), 2023-01-01
Supplement: d3cp03679k1.pdf [file d3cp03679k1.pdf]

*Supporting Information for*

Influence of Ligand Variation on the Deactivation Process of  
Metal-to-Ligand Charge Transfer Excited States in Quadruply  
Bonded Dimolybdenum Complexes

Yuqing Shi,<sup>a</sup> Juanjuan Li,<sup>a</sup> Can Cui,<sup>a</sup> Guanzhi Wu\*,<sup>b</sup> Tao Cheng\*<sup>a</sup>

<sup>a</sup> School of Chemistry and Chemical Engineering, Qilu University of Technology (Shandong

Academy of Sciences), Jinan, 250353, P.R. China

<sup>b</sup> Department of Chemistry, University of Sheffield, Sheffield, S3 7HF, UK

## 1. Experimental methods

**Compounds preparation.** The synthesis of **[Mo<sub>2</sub>]-ph** has been previously published.<sup>1</sup> **[Mo<sub>2</sub>]-naph** and **[Mo<sub>2</sub>]-anth** were prepared using a similar method, and the synthesis procedures are depicted in Scheme S1. HDAniF,<sup>2</sup> Mo<sub>2</sub>(O<sub>2</sub>CCH<sub>3</sub>)<sub>4</sub>,<sup>3</sup> and Mo<sub>2</sub>(DAniF)<sub>3</sub>(O<sub>2</sub>CCH<sub>3</sub>)<sub>4</sub><sup>4</sup> were used as starting materials, following established protocols. Synthetic manipulations requiring an inert atmosphere were conducted under N<sub>2</sub> gas, using standard Schlenk line techniques. To maintain anhydrous conditions, we used dry solvents such as tetrahydrofuran (THF), CH<sub>2</sub>Cl<sub>2</sub>, and ethanol. These solvents were purified by distillation over Na, CaH<sub>2</sub>, and Mg respectively, under an N<sub>2</sub> atmosphere over 4 Å molecular sieves. NMR spectra were recorded on Bruker Ascend 300 MHz spectrometers, and chemical shifts were reported relative to the residual solvent signal (CHCl<sub>3</sub>, <sup>1</sup>H δ, 7.26 ppm).

**Steady-state spectroscopies.** All measurements were performed at room temperature. UV-Vis absorption spectra were recorded on a Shimadzu UV-1800 spectrophotometer equipped with a 2 mm quartz cuvette. Fluorescence measurements were performed using a Shimadzu RF-6000 spectrophotometer.

**Femtosecond Transient Absorption (TA) Experiment.** The TA experiments were conducted using a spectrometer equipped with a Ti/sapphire regenerative amplifier, which provided 800 nm pulses with a full width at half maximum (FWHM) of 40 fs. The laser output was divided into two beams. One of the beams served as the probe beam, generating a white light continuum. The other beam was directed into an optical parametric amplifier to generate the pump beam centered at 355 nm, which was then directed to the translation stage. A mechanical chopper was used to modulate the pump repetition frequency. The polarization of the pump beam was set to the magic angle (54.7°) with respect to the probe beam. The optical path through the samples was set to 2 mm.

## 2. Synthesis

### *General method for the synthesis of [Mo<sub>2</sub>]-naph and [Mo<sub>2</sub>]-anth*

A solution of sodium ethoxide (0.20 mmol) in 10 mL of ethanol was added to a solution of Mo<sub>2</sub>(DAniF)<sub>3</sub>(O<sub>2</sub>CCH<sub>3</sub>) (0.20 mmol) in 20 mL of THF. The resulting mixture was stirred at room temperature for 2 hours, and then the solvent was removed under vacuum. The residue was dissolved in 25 mL of CH<sub>2</sub>Cl<sub>2</sub> and filtered through a Celite-packed funnel. The filtrate was then mixed with amide ligands (0.15 mmol) and stirred for an additional 3 hours, leading to the formation of the products. The products were collected by filtration and washed with ethanol three times, each with 20 mL of ethanol.

**[Mo<sub>2</sub>]-naph:** <sup>1</sup>H NMR (300 MHz, CDCl<sub>3</sub>) δ 8.81 (s, 1H), 8.58 – 8.40 (m, 3H), 8.38 (d, *J* = 4.1 Hz, 1H), 7.84 (dd, *J* = 13.3, 6.9 Hz, 3H), 7.48 (dd, *J* = 15.9, 8.4 Hz, 2H), 7.30 (dd, *J* = 14.9, 7.5 Hz, 1H), 6.71 – 6.57 (m, 11H), 6.50 (dt, *J* = 11.3, 5.7 Hz, 3H), 6.42 (dd, *J* = 8.6, 6.3 Hz, 6H), 6.34 – 6.20 (m, 4H), 3.69 (dd, *J* = 10.5, 7.4 Hz, 18H).

**[Mo<sub>2</sub>]-anth:** <sup>1</sup>H NMR (400 MHz, CDCl<sub>3</sub>) δ 8.89 (s, 1H), 8.64 (s, 2H), 8.58 – 8.42 (m, 4H), 8.00 (d, *J* = 7.7 Hz, 2H), 7.41 (dt, *J* = 14.3, 6.4 Hz, 4H), 6.73 – 6.54 (m, 12H), 6.48 (dt, *J* = 12.4, 9.5 Hz, 8H), 6.38 – 6.20 (m, 4H), 3.75 – 3.63 (m, 18H).

**Scheme S1.** Synthetic routes for **[Mo<sub>2</sub>]-naph** and **[Mo<sub>2</sub>]-anth**.

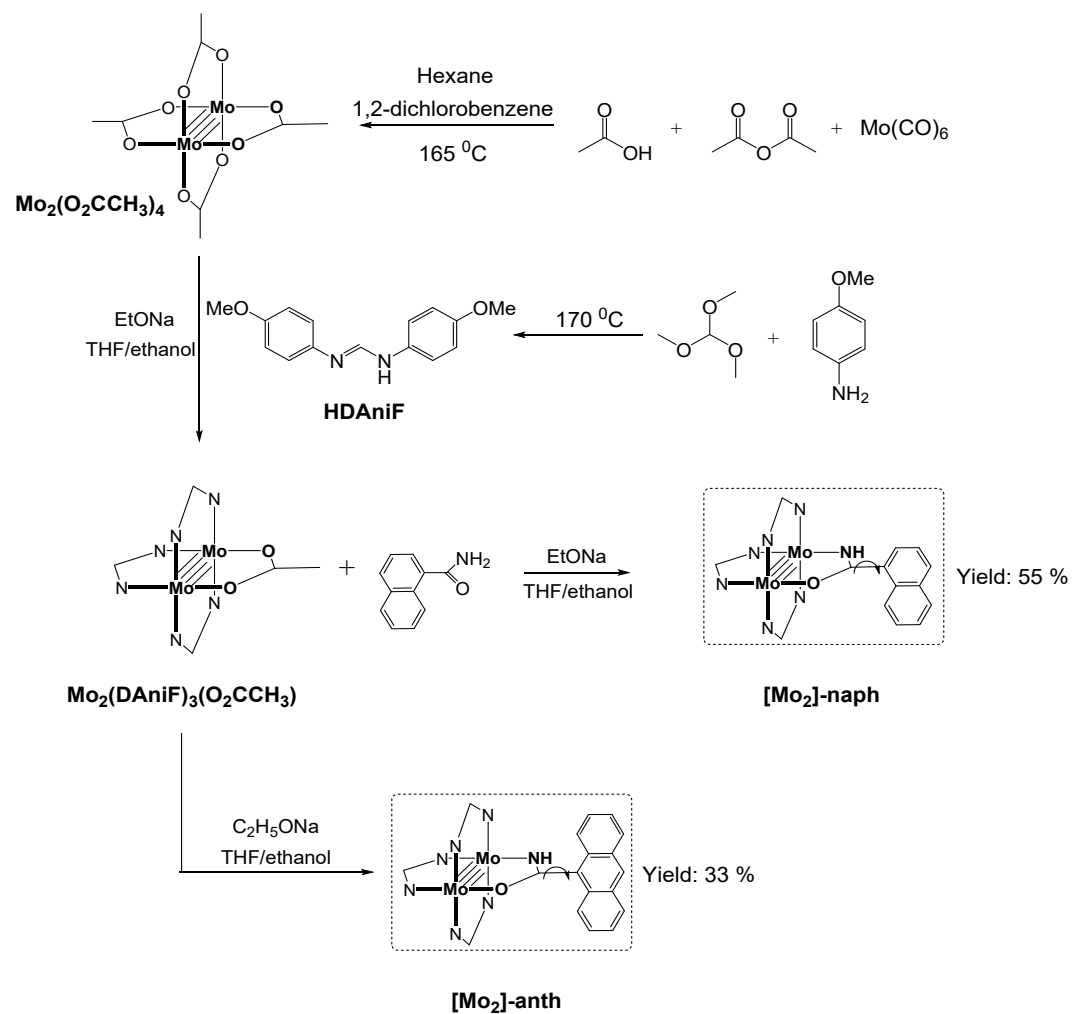

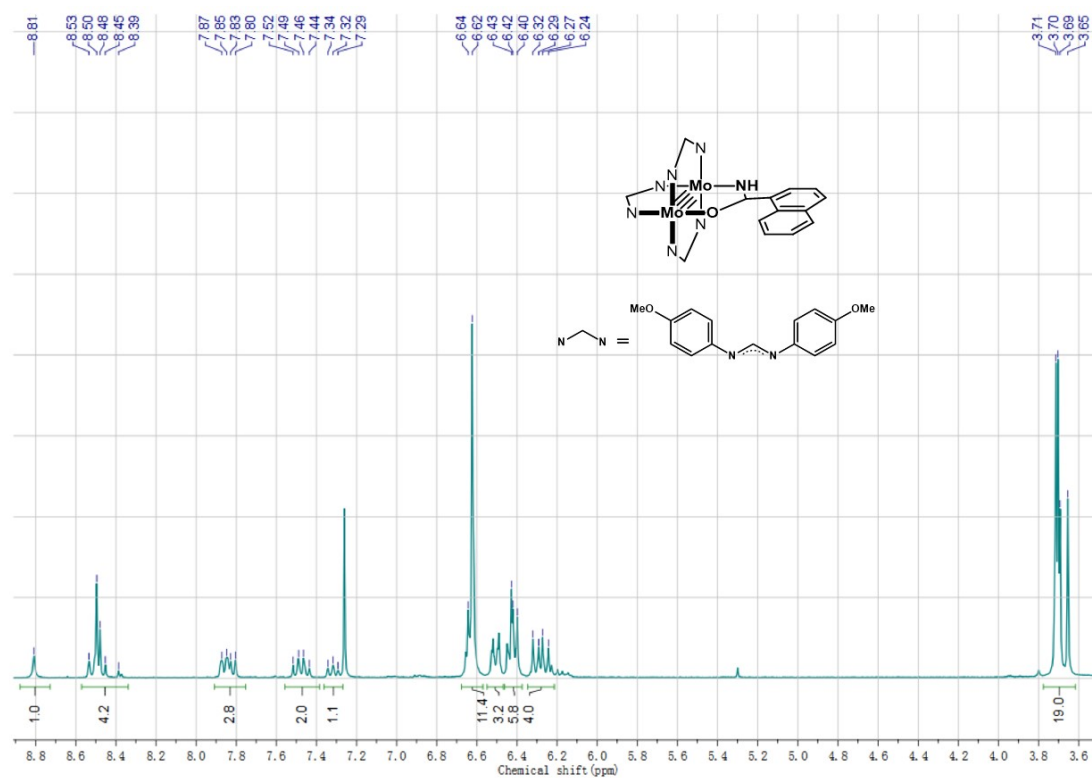

**Figure S1.  $^1\text{H}$  NMR of  $[\text{Mo}_2]\text{-naph}$  in  $\text{CDCl}_3$ .**

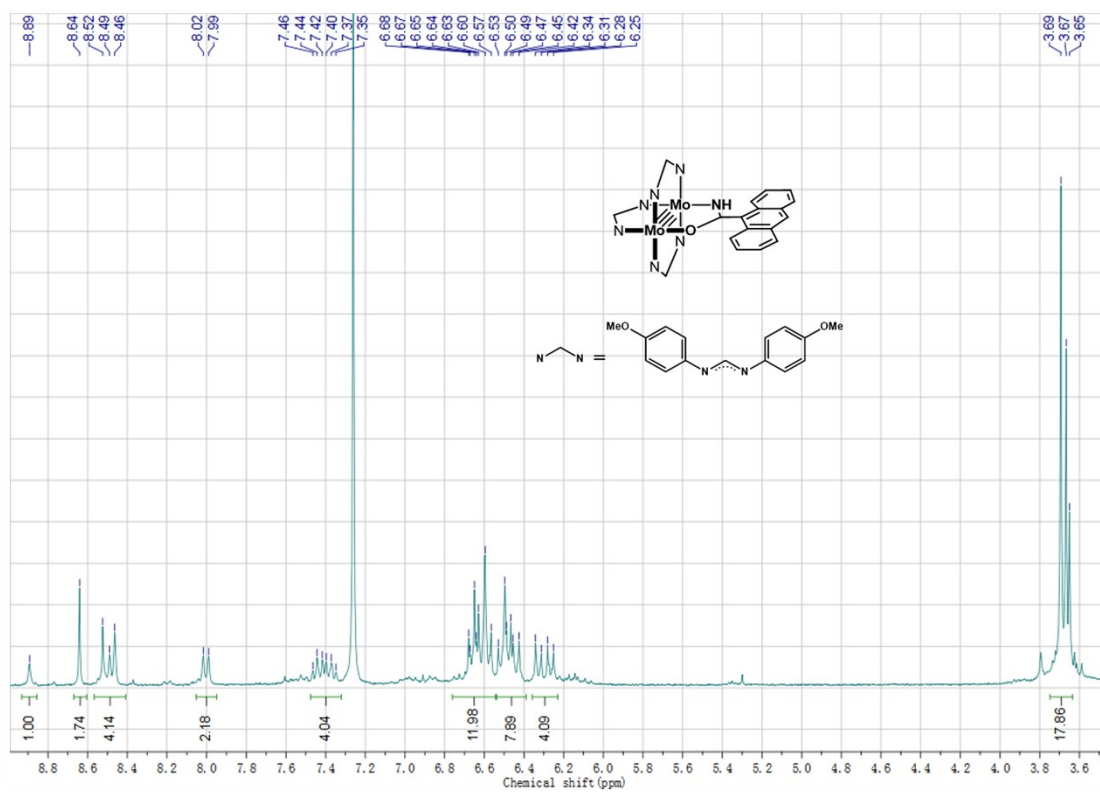

**Figure S2.  $^1\text{H}$  NMR of  $[\text{Mo}_2]\text{-anth}$  in  $\text{CDCl}_3$ .**

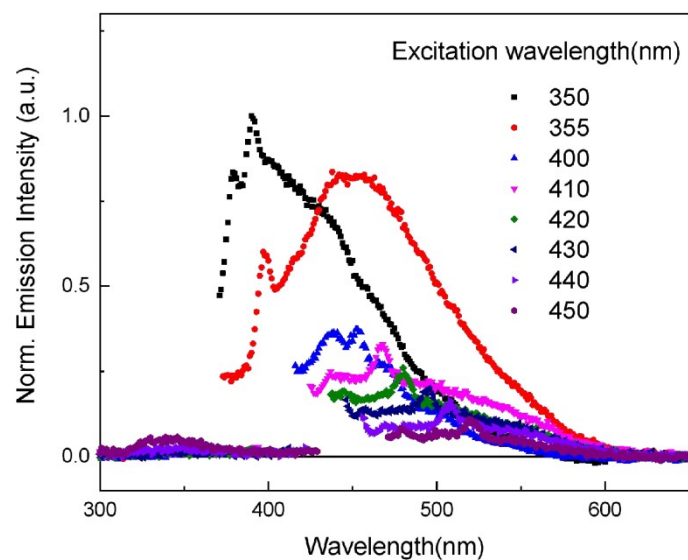

**Figure S3.** Emission spectra of **[Mo<sub>2</sub>]-naph** in CH<sub>2</sub>Cl<sub>2</sub> with excitation at various wavelengths.

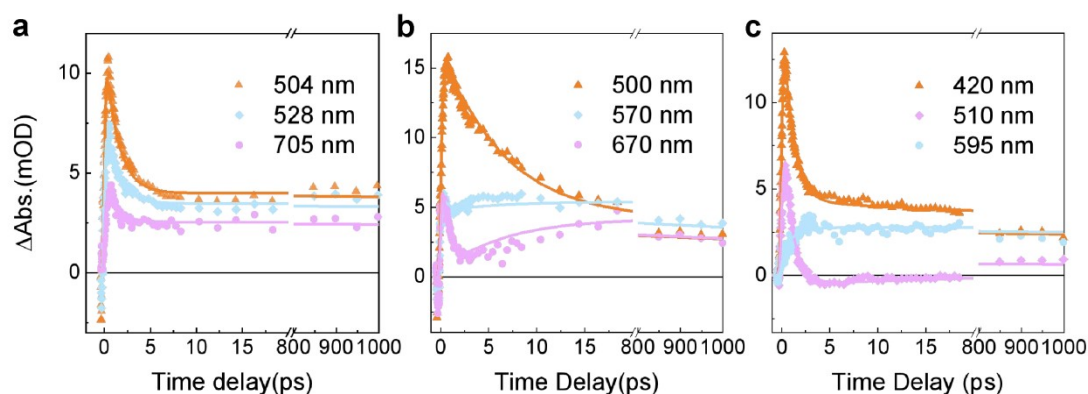

**Figure S4.** Kinetic traces(dots) and fitting traces(line) at selected wavelengths obtained by global fitting on the TA spectra of **[Mo<sub>2</sub>]-ph**(a), **[Mo<sub>2</sub>]-naph** (b) and **[Mo<sub>2</sub>]-anth** (c).

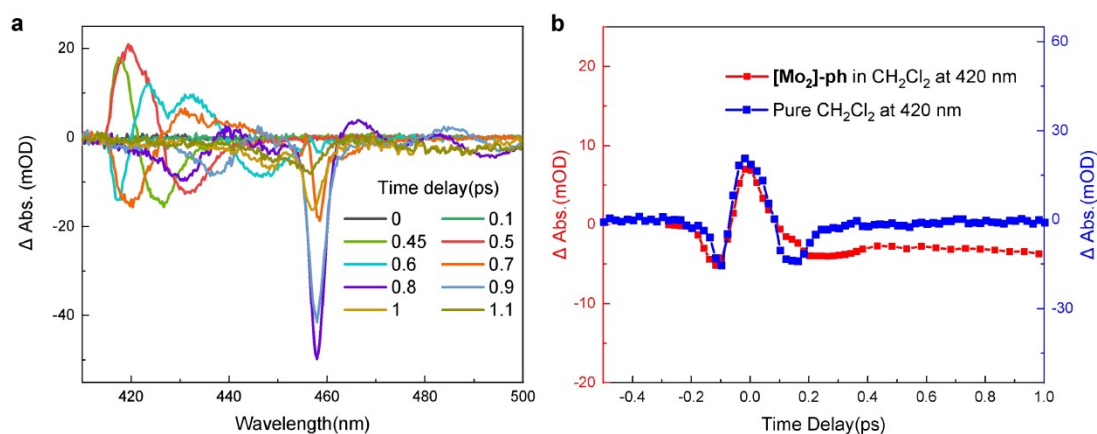

**Figure S5.** Transient absorption spectra of pure CH<sub>2</sub>Cl<sub>2</sub> (a) and a comparison of the kinetic trace obtained from 355 nm excitation and probed at 420 nm for **[Mo<sub>2</sub>]-ph** (red) and CH<sub>2</sub>Cl<sub>2</sub> (blue).

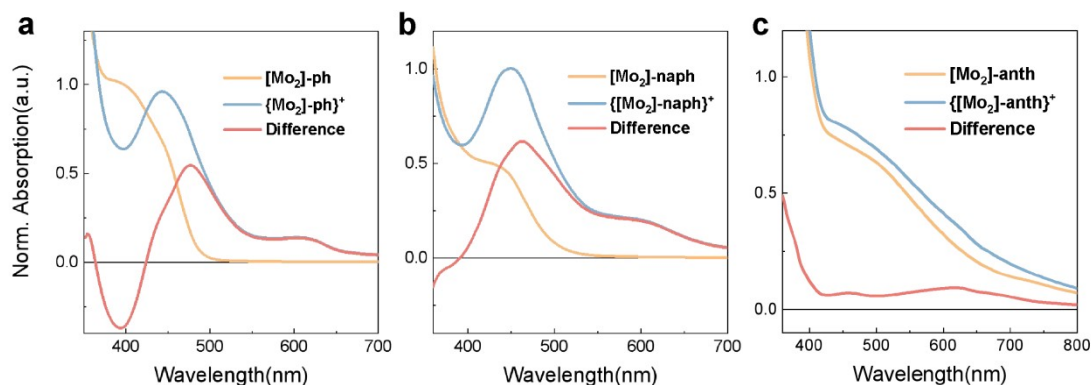

**Figure S6.** Steady-state difference spectra for  $[\text{Mo}_2]\text{-ph}$ (a),  $[\text{Mo}_2]\text{-naph}$ , (b) and  $[\text{Mo}_2]\text{-anth}$  (c), resulting from subtraction of the absorption for the neutral from those of the cationic species generated by chemical oxidation using one equiv of ferrocenium hexafluorophosphate

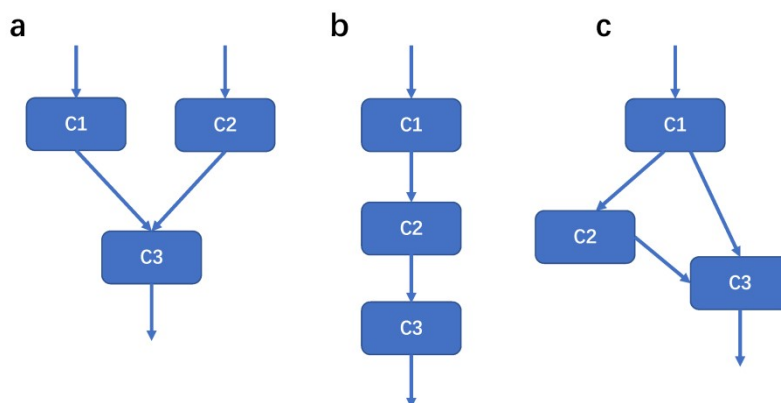

**Figure S7.** Global analysis model used in global analysis on TA spectra of  $[\text{Mo}_2]\text{-ph}$  (a),  $[\text{Mo}_2]\text{-naph}$  (b) and  $[\text{Mo}_2]\text{-anth}$  (c).

## Reference

- 1 W. Y. Yu, M. Meng, H. Lei, X. D. He and C. Y. Liu, *J. Phys. Chem. C*, 2016, **120**, 12411-12422.
- 2 C. Lin, J. D. Protasiewicz, E. T. Smith and T. Ren, *Inorg. chem.*, 1996, **35**, 6422-6428.
- 3 A. B. C. Brignole, F. A. Cotton, *Inorg. Synth.*, 1972, **13**, 81-89.
- 4 F. A. Cotton, C. Y. Liu, C. A. Murillo, D. Villagrán and X. Wang, *J. Am. Chem. Soc.*, 2003, **125**, 13564-13575.
